# Supplementary material for: Racism in European Health Care: Structural Violence and Beyond
Source: PubMed Central journal article supplement (PMC7410275; doi:10.1177/1049732320931430), 2020-06-16
Supplement: sj-pdf-1-qhr-10.1177_1049732320931430.pdf [file sj-pdf-1-qhr-10.1177_1049732320931430.pdf]

## **Supplementary Material**

**Table S1:** Participant characteristics (N=11)

|                              | N (%)   |      |
|------------------------------|---------|------|
| <b>Gender</b>                |         |      |
| <i>Male</i>                  | 4 (36%) |      |
| <i>Female</i>                | 7 (64%) |      |
| <b>Age<sup>a</sup>, Mean</b> |         | 47.7 |
| <i>20-30 years</i>           | 1 (9%)  |      |
| <i>30-40 years</i>           | 2 (18%) |      |
| <i>40-50 years</i>           | 4 (36%) |      |
| <i>Over 50 years</i>         | 4 (36%) |      |
| <b>Marital status</b>        |         |      |
| <i>Married</i>               | 7 (64%) |      |
| <i>Single</i>                | 2 (18%) |      |
| <i>Divorced</i>              | 1 (9%)  |      |
| <i>Widow</i>                 | 1 (9%)  |      |
| <b>Employment</b>            |         |      |
| <i>Employed</i>              | 6 (55%) |      |
| <i>Non employed</i>          | 2 (18%) |      |

---

|                |        |
|----------------|--------|
| <i>Student</i> | 1 (9%) |
|----------------|--------|

---

|                  |         |
|------------------|---------|
| <i>Pensioner</i> | 2 (18%) |
|------------------|---------|

---

|                    |        |
|--------------------|--------|
| <i>Unspecified</i> | 1 (9%) |
|--------------------|--------|

---

### Religion

---

|              |         |
|--------------|---------|
| <i>Islam</i> | 5 (45%) |
|--------------|---------|

---

|                     |         |
|---------------------|---------|
| <i>Christianity</i> | 2 (18%) |
|---------------------|---------|

---

|              |        |
|--------------|--------|
| <i>Hindu</i> | 1 (9%) |
|--------------|--------|

---

|                            |        |
|----------------------------|--------|
| <i>Non practising Sikh</i> | 1 (9%) |
|----------------------------|--------|

---

|                         |         |
|-------------------------|---------|
| <i>Atheist/Agnostic</i> | 2 (18%) |
|-------------------------|---------|

---

### Ethnicity

---

|                |        |
|----------------|--------|
| <i>African</i> | 1 (9%) |
|----------------|--------|

---

|               |        |
|---------------|--------|
| <i>Somali</i> | 1 (9%) |
|---------------|--------|

---

|                |        |
|----------------|--------|
| <i>Chilean</i> | 1 (9%) |
|----------------|--------|

---

|                |        |
|----------------|--------|
| <i>Turkish</i> | 1 (9%) |
|----------------|--------|

---

|               |        |
|---------------|--------|
| <i>Indian</i> | 1 (9%) |
|---------------|--------|

---

|                      |         |
|----------------------|---------|
| <i>Not specified</i> | 4 (36%) |
|----------------------|---------|

---

### Time living in neighbourhood

---

|                   |         |
|-------------------|---------|
| <i>5-10 years</i> | 2 (18%) |
|-------------------|---------|

---

|                    |         |
|--------------------|---------|
| <i>10-20 years</i> | 3 (27%) |
|--------------------|---------|

---

|                      |         |
|----------------------|---------|
| <i>20-30 years</i>   | 1 (9%)  |
| <i>Over 30 years</i> | 5 (45%) |
| Language proficiency |         |
| <i>Fluent</i>        | 8 (72%) |
| <i>Non-Fluent</i>    | 3 (27%) |

<sup>a</sup> at the time of the interview

<sup>b</sup> as identified by the participant
